# Supplementary material for: Netrins and Frazzled/DCC promote the migration and mesenchymal to epithelial transition of Drosophila midgut cells
Source: PubMed Central journal article supplement (PMC4365492; doi:10.1242/bio.201410827), 2015-01-23
Supplement: supp_bio.201410827_bio.201510827-s1.pdf [file supp_bio.201410827_bio.201510827-s1.pdf]

## Supplementary Material

Melissa Pert et al. doi: 10.1242/bio.201410827

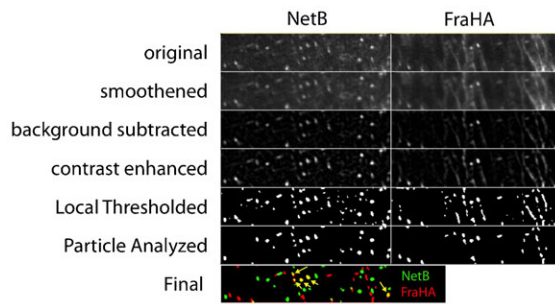

**Fig. S1. Quantification of NetB/FraHA colocalisation.** NetB and FraHA colocalisation was performed in stage 13 embryos using an image-processing pipeline in ImageJ. For each embryo, 10 z-slices, with a z-step size of 2 microns, were analysed for vesicles as follows. Each channel was independently i) smoothed; ii) background-subtracted (using the rolling ball method with radius=3); iii) contrast-enhanced (0.1% saturated pixels); iv) locally thresholded (using Mean method, radius=5, constant=-30; and finally put through an “Analyze Particles” pass to exclude puncta that were too small ( $A < 8$  pixels), or which had an elongated shape (circularity  $< 0.6$ ) such as regions of FraHA expression along the plasma membrane. A typical region with processing steps is shown. For each embryo, the total number (combined value from the 10 slices) of vesicles was determined, which were positive for FraHA&NetB, FraHA alone or NetB alone (yellow arrows depict colocalisation).

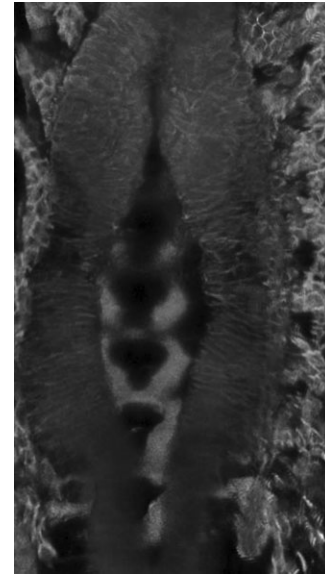

**Movie 1.** 3D rendering of a stage 13  $w^{1118}$  embryo stained for the cell adhesion molecule Fas2 to highlight the cell morphology and arrangement. A columnar epithelium has formed.

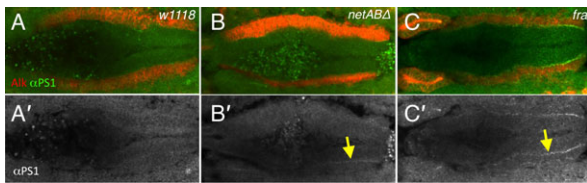

**Fig. S2. Netrin and Fra regulate  $\alpha$ PS1 localisation.** (A–C)  $\alpha$ PS1 is not obviously localised in  $w^{1118}$  control embryos ( $n=12$ ) (A') but a faint line at the midgut/VM interface is seen in  $netAB^{\Delta}$  embryos ( $n=10/13$ ) (B', arrow) and this is even clearer in  $fra^3/Df(2R)BSC880$  mutants ( $n=5/5$ ) (C', arrow).

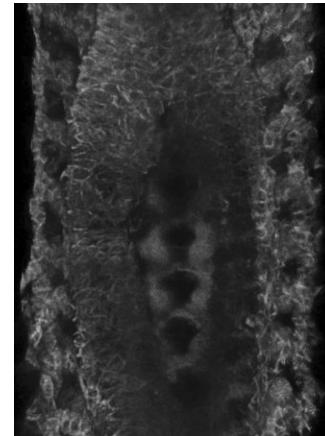

**Movie 2.** 3D rendering of a stage 13  $netAB^{\Delta}$  mutant embryo stained for the cell adhesion molecule Fas2 to highlight the cell morphology and arrangement. A columnar epithelium has not formed: cells are more rounded and disordered.
